1 **MOLECULAR DOCKING ANALYSIS OF SOME PHYTOCHEMICALS ON TWO**  
2 **SARS-COV-2 TARGETS**

3

4 **POTENTIAL LEAD COMPOUNDS AGAINST TWO TARGET SITES OF**  
5 **SARS-COV-2 OBTAINED FROM PLANTS**

6

7 Amaka Ubani<sup>1</sup>, Francis Agwom<sup>2</sup>, oluwatoyin RuthMorenikeji<sup>1</sup> Shehu Nathan<sup>3</sup>, Pam  
8 Luka<sup>4</sup>, Arinze Umera<sup>1</sup>, Usal Uma<sup>1</sup>r, Simeon Omale<sup>4</sup>, Nnaemeka Emmanuel Nnadi,  
9 John Chineye Aguiyi<sup>1</sup>

10

- 11 1. African Centre of Excellence in Phytomedicine research and Development,  
12 University of Jos, Jos, Plateau State, Nigeria
- 13 2. Department of pharmaceutical & Medicinal Chemistry, Faculty of  
14 Pharmaceutical Sciences, University of Jos, Nigeria
- 15 3. Biotechnology Centre, National Veterinary Research Institute, Vom. Nigeria
- 16 4. Department of Pharmacology, Faculty of Pharmaceutical Sciences, University  
17 of Jos, Jos, Plateau State
- 18 5. Department of Microbiology, Faculty of Natural and Applied Sciences, Plateau  
19 State University, Bokkos, Nigeria

20 \* Correspondence: eennadi@gmail.com; Tel.: (+2348068124819)

21 Abstract:

22 COV spike (S) glycoprotein and M<sup>pro</sup> are two key targets that have been identified for  
23 vaccines and drug development against the COVID-19 disease. Virtual screening of  
24 some compounds of plants origin that have shown antiviral activities were carried out  
25 on the two targets, 6lu7 and 6vsb by docking with the PyRx software. The binding  
26 affinities were compared with other compounds and drugs already identified as  
27 potential ligands for 6lu7 and 6vsb as well as Chloroquine and hydroxychloroquine.  
28 The docked compounds with best binding affinities were also filtered for drug  
29 likeness using the SwissADME and PROTOX platforms on the basis of  
30 Physicochemical properties and toxicity respectively. The docking results revealed  
31 that scopodulcic acid and dammarenolic acid had the best binding affinity on the  
32 s-glycoprotein and M<sup>pro</sup> protein targets respectively. Silybinin also demonstrated a  
33 good binding affinity to both protein targets making it a potential candidate for  
34 further evaluation as repurposed candidate for SARS COV2 with likelihood of having  
35 a multitarget activity.

36 **Keywords:** *Covid-19, s-glycorotein, Mpro, Virtual screening*

37

---

38

## 39 **1. Introduction**

40 Severe acute respiratory syndrome coronavirus 2 (SARS-CoV-2),  
41 family *Coronaviridae*, genus *Betacoronavirus*, is spreading widely in China, causing  
42 coronavirus disease 2019 (COVID-19)(1). Since 2003, three Coronaviruses have  
43 been associated with pneumonia, the first was severe acute respiratory syndrome  
44 coronavirus (SARS-CoV)(2) which affected 8,098 people causing 774 deaths between  
45 2002 and 2003(3), the second was Middle-East respiratory syndrome coronavirus  
46 (MERS-CoV)(4) which affected 27 countries and infecting a total of 2,494 individuals  
47 and claiming 858 lives(4). SARS-CoV-2 is a human pathogen which has been  
48 declared a global pandemic by the World Health Organisation (5). SARS-CoV and  
49 SARS-CoV-2 are closely related and originated in bats, who most likely serve as  
50 reservoir host for these two viruses (4). To date, no therapeutics or vaccines are  
51 approved against any human-infecting coronaviruses(4).

52

53 The entry into the host cell by the Coronaviruses is usually mediated by spike (S)  
54 glycoprotein (4). This glycoprotein interacts with the angiotensin-converting enzyme  
55 2 (ACE2) enabling the virus penetration into the host. The main protease ( $M^{pro}$  also  
56 known as  $3CL^{pro}$ ) is one of the best characterized drug targets among coronaviruses  
57 (6). The protease enzyme is essential for processing the polyproteins that are  
58 translated from the viral RNA(7). For this study, these two drug targets were  
59 selected for SARS-CoV-2 using plant based compounds screened against them.

60

61 Therefore, potent inhibitors of these two targets will be able to interfere with the  
62 SARS COV-2 replication process and thus serves as potential drugs for the  
63 management of the COVID-19. Hence, this work is aimed at identifying other

64 potential lead compounds of plant origin that can serve as candidates for testing  
65 against the SARS COV2 virus.

66 .

67 .

## 68 **2. Results**

69 A library of 22 compounds of plant origin known to have antiviral activity were  
70 obtained from Pubchem data base. Though the compounds are chemically diverse  
71 they consist of largely flavonoids and terpenes. Some compounds from the citrus  
72 family made were found among the library, though they could not make it among the  
73 top six selected compounds for each target demonstrated some good binding  
74 affinities.

75 Most of the compounds has showed similar binding affinities to the selected protein  
76 targets (6lu7 and 6vsb) compared to the training sets of known ligands to the  
77 selected targets. (See table 1)

78

79

80

81

82

83

84

85

86

87

88

89

90

91 **Table 1.** Comparison of Binding affinities of library to some known ligands and the  
92 co-crystalised ligand

| Protein target | Co-crystallized ligand | Ligands (drugs) used in treatment | Phytochemicals         |
|----------------|------------------------|-----------------------------------|------------------------|
| 6LU7           |                        | Remesivir -7.1                    | Dammarenolic acid -7.2 |
|                |                        | Favipiravir -5.3                  | Quercetin -7.1         |
|                |                        | Chloroquine -5.2                  | Solanidine -7.0        |
|                |                        |                                   | Silymarin -6.9         |
|                |                        |                                   | Silvestrol -6.7        |
|                |                        |                                   | Shikonin -6.6          |
| 6VSB           |                        | Remesivir -7.3                    | Scopadulcic acid -9.6  |
|                |                        | Favipiravir -5.3                  | Baicalin -9.4          |
|                |                        | Chloroquine -5.2                  | Legalon -9.2           |
|                |                        |                                   | Solanidine -9.1        |
|                |                        |                                   | Naringenin -9.0        |
|                |                        |                                   | Oleanane -9.0          |
|                |                        | Silymarin -8.6                    |                        |

93

94

95 However, the top six compounds with most favourable binding affinity were selected  
96 for each of the targets.

97 The outcome of the binding affinities of the selected compounds on the 6lu7 and 6vbs  
98 targets are presented in **Table 2 and Table 3** respectively.

99

100

101

102 **TABLE 2** binding affinities of the compounds on the 6vbs and their Interaction with  
103 the binding site

| S/N | Ligands | Binding Affinity (Kcal/Mol) | Hydrogen Bond Interaction | Hydrophobic Interaction with Residues | Bond |
|-----|---------|-----------------------------|---------------------------|---------------------------------------|------|
|-----|---------|-----------------------------|---------------------------|---------------------------------------|------|

|           |                  |      | <b>with Residues</b>                                       |                                                                                                                                                                                                   |
|-----------|------------------|------|------------------------------------------------------------|---------------------------------------------------------------------------------------------------------------------------------------------------------------------------------------------------|
| <b>1.</b> | Scopadulcic Acid | -9.6 | GLN B: 913                                                 | TYR C:904, GLY B:1093, VAL B:911, ARG B: 1107, ASN B:907, THR B:912, ASN B:1119, GLN B:1113, GLY B: 910, GLN B:1106, GLU B:1092, PHE A:1121, ARG A:1091                                           |
| <b>2.</b> | Baicalin         | -9.4 | ARG B:1039, ARG A:1039, ARG C:1039, ALA B:1020, ASN C:1023 | ALA C:1026, LEU B:1024, GLN C:784, SER C:1030, ASP B:1041, LEU C:1024, THR C:1027, PHE B:1042, PHE C:1042, PHE A:1042, THR B:1027, SER B:1021, GLU C:780.                                         |
| <b>3.</b> | Sylibinin        | -9.2 | GLU A:954, ARG B:765                                       | GLU A:1017, ARG A:1014, ALA B:766, LYS B:776, LYS A:947, LEU A:948, PRO A:728, VAL A:951, ILE A:1018, ALA B:766, GLN A:957, GLN B:762, GLN A:1010, ILE A:1013, LEU B:1012, ARG B:1019, GLU B:773. |
| <b>4.</b> | Solanidine       | -9.1 |                                                            | TYR A:369, TYR C:489, ARG C:454, PRO C:491, TYR C:421, ASN C:460, LEU C:461                                                                                                                       |
| <b>5.</b> | Naringenin       | -9.0 | GLU C:1092, ARG C:1107, ASN C:1108, GLY C:910, ILE C:909   | ASN C:907, THR C:912, GLN C:1113, ARG B:1091, GLU B:1092, GLY C:1093, GLN C:1106, TYR A:904                                                                                                       |
| <b>6.</b> | Oleanane         | -9   |                                                            | LEU A:1141, ASP C:1118, LEU C:1141, PRO A:1140, ASP A:1118, THR A:1117, THR B:1116, ASP B:1118, PRO B:1140, GLU B:1144, ASP A:1139, GLU A:1144                                                    |

104

105

106 **TABLE 3** binding affinities of the compounds on the 6LU7 and their Interaction with

107 the binding site

| <b>S/N</b> | <b>Ligands</b> | <b>Binding Affinity (Kcal/Mol)</b> | <b>Hydrogen Bond Interaction</b> | <b>Hydrophobic Interaction with Residues</b> | <b>Bond</b> |
|------------|----------------|------------------------------------|----------------------------------|----------------------------------------------|-------------|
|------------|----------------|------------------------------------|----------------------------------|----------------------------------------------|-------------|

|           |                   | <b>with Residues</b> |                                                                                                                                                                     |
|-----------|-------------------|----------------------|---------------------------------------------------------------------------------------------------------------------------------------------------------------------|
| <b>1.</b> | Dammarenolic acid | -7.2                 | THR A: 111,<br>GLN A: 110,<br>GLN A: 107                                                                                                                            |
|           |                   |                      | VAL A:104, ARG A: 105, ILE A: 106, THR A: 292, PHE A: 112, GLN A: 127, ASP A: 295, ASN A: 152, PHE A: 294, PHE A: 294, PHE A: 8, ASP A: 153, SER A: 158, ILE A: 152 |
| <b>2.</b> | Quercetin         | -7.1                 | -----                                                                                                                                                               |
| <b>3.</b> | Solanidine        | -7.0                 | -----                                                                                                                                                               |
|           |                   |                      | VAL A: 104, LYS A: 102, SER A: 158, ASP A: 153, ILE A: 152, ASN A: 151, ASN A: 151, PHE A: 8, ARG A: 105, GLN A: 107, ILE A: 106                                    |
| <b>4.</b> | Silybinin         | -6.8                 | ARG A: 105,<br>ASP A: 176                                                                                                                                           |
|           |                   |                      | ASN A: 180, GLU A: 178, PHE A: 103, VAL A: 104, SER A: 158, ASN A: 151, THR A: 111, GLN A: 110, ILE A: 106, GLN A: 107                                              |
| <b>5.</b> | Loliolide         | -6.7                 | -----                                                                                                                                                               |
| <b>6.</b> | Shikonin          | -6.6                 | THR A: 111,<br>SER A: 158                                                                                                                                           |
|           |                   |                      | PHE A: 294, PHE A: 8, GLN A: 110, ILE A: 106, ASN A: 151, PHE A: 112, LYS A: 102, ASP A: 153, VAL A: 104                                                            |

108

109 The binding affinities of the top six compounds on the 6vsb target are comparable to  
 110 each other that is they all lie within a close range of 9 to 9.6 kcal/mol indicating that  
 111 they might likely have equal or comparable potential as lead compounds for the 6vsb  
 112 spike glycoprotein.

113

114

115

116

117

118 **Table 4.** Comparison of the calculated cLog P values for the selected compounds

| S/N | Compound         | SwisADME<br>cLog P | Molinspiration<br>cLog p | Mean calculated cLog P |
|-----|------------------|--------------------|--------------------------|------------------------|
| 1.  | Scopodulcic acid | 4.57               | 5.01                     | 4.79                   |

---

|     |                   |      |      |      |
|-----|-------------------|------|------|------|
| 2.  | Baicalin          | 0.22 | 0.55 | 0.77 |
| 3.  | Sylibinin         | 1.59 | 1.47 | 3.06 |
| 4.  | Solanidine        | 5.01 | 5.93 | 5.47 |
| 5.  | Naringenin        | 1.84 | 2.12 | 1.98 |
| 6.  | Oleanane          | 8.57 | 8.86 | 8.72 |
| 7.  | Dammarenolic acid | 6.74 | 8.08 | 7.41 |
| 8.  | Quercetin         | 1.23 | 1.68 | 1.46 |
| 9.  | Loliolide         | 1.53 | 1.84 | 1.69 |
| 10. | Shikonin          | 2.08 | 2.02 | 2.05 |

---

119

120 clog P = octanol/water coefficient

121

122

123 One of the compounds sylibinin (8) is an FDA approved drug, which showed up as  
124 active on both MPro and spike glycoprotein will make a good candidate of  
125 repurposing. Finding Quercetin as a potential inhibitor of the Mpro Protein (6flu7) of  
126 the SARS COV2 corresponds with an earlier report(9)

127

128

129 Looking at the the cLog P of the compounds, there was no correlation observed  
130 between the lipophilicity and the interaction with the receptors. However, for the  
131 compounds acting on 6lu7 (S/N 3,4,7,8,9 and 10 in Table 4), interaction with the  
132 receptor is correlated with low lipophilicity with the exception of solanidine and  
133 Dammarenolic acid that are have high cLogP values. Though both compounds also  
134 use their polar functional groups in interacting with the receptor. Baicalin and  
135 Naringenin showed good hydrogen bond interaction with the 6vsb receptor due to  
136 their polarity.

137

138 Filtering the compounds for drug likeness on the basis of Lipinski's and/or Veber's  
139 rule showed that all the compounds have drug like properties except baicalin which  
140 failed the two filtering scales applied (Table 5). This implies that baicalin is not worth  
141 considering further without any structural modification.

142 **Table 5. Drug likeness**

| S/N | Compound             | Mol.<br>Wt <sup>a</sup> (g/mol) | TPSA <sup>b</sup> | HBA <sup>c</sup> | HBD <sup>d</sup> | RB <sup>e</sup> | cLogP <sup>f</sup> | Lipinski<br>filter | Veber<br>filter |
|-----|----------------------|---------------------------------|-------------------|------------------|------------------|-----------------|--------------------|--------------------|-----------------|
| 1.  | Scopodulcic<br>acid  | 438.56                          | 80.67             | 5                | 1                | 4               | 4.79               | +                  | +               |
| 2.  | Baicalin             | 446.36                          | 187.12            | 11               | 6                | 4               | 0.77               | -                  | -               |
| 3.  | Sylibinin            | 482.44                          | 155.14            | 10               | 5                | 4               | 3.06               | +                  | -               |
| 4.  | Solanidine           | 397.64                          | 23.47             | 2                | 1                | 0               | 5.47               | +                  | -               |
| 5.  | Naringenin           | 272.25                          | 86.99             | 5                | 3                | 1               | 1.98               | +                  | +               |
| 6.  | Oleanane             | 412.75                          | 0.00              | 0                | 0                | 0               | 8.72               | +                  | +               |
| 7.  | Dammarenolic<br>acid | 458.72                          | 57.53             | 3                | 2                | 1               | 7.41               | +                  | +               |
| 8.  | Quercetin            | 302.24                          | 131.36            | 7                | 5                | 1               | 1.46               | +                  | +               |
| 9.  | Loliolide            | 196.24                          | 46.53             | 3                | 1                | 0               | 1.69               | +                  | +               |
| 10. | Shikonin             | 288.3                           | 94.83             | 5                | 3                | 3               | 2.05               | +                  | +               |

143

144 <sup>a</sup>Mol. Wt.: Molecular weight

145 <sup>b</sup>TPSA: Total Polar Surface Area

146 <sup>c</sup>No. HBA: Number of hydrogen bond acceptors

147 <sup>d</sup>No. HBD: Number of hydrogen bond donors

148 <sup>e</sup>No. RB: Number of rotatable bonds

149 <sup>f</sup>Mean clog P: Mean of calculated log P values



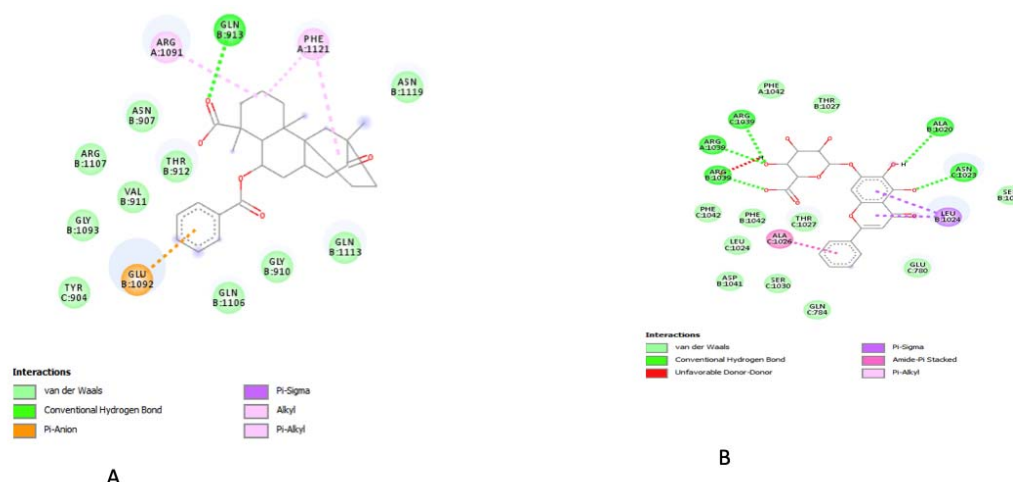

**Figure 1.** Best Binding pose and Interaction of (a) Scopoludic acid and (b) Baicalin on the 6vsb protein.

150

151

152 Table 6. Predicted Toxicity Profile of the compounds using PROTOX II

| <b>S/<br/>N</b> | <b>Compound</b>   | Hepatotoxicity | ImmunoToxicity | Carcinogenicity | Mutagenicity | Cytotoxicity | Possible Toxicity Targets |
|-----------------|-------------------|----------------|----------------|-----------------|--------------|--------------|---------------------------|
| 1.              | Scopoludic acid   | -              | ++             | -               | -            | -            | AR, AO, PGS               |
| 2.              | Baicalin          | --             | --             | +               | -            | --           | AO, PGS                   |
| 3.              | Sylibinin         | --             | ++             | -               | --           | --           | PGS                       |
| 4.              | Solanidine        | --             | ++             | -               | --           | +            | AR, PGS                   |
| 5.              | Naringenin        | -              | --             | -               | --           | +            | AR, PGS                   |
| 6.              | Oleanane          | --             | --             | ++              | --           | --           |                           |
| 7.              | Dammarenolic acid | -              | -              | --              | --           | --           | AR, AO PGS                |
| 8.              | Quercetin         | -              | +              | --              | -            | --           | AO, AR, PGS               |
| 9.              | Loliolide         | -              | +              | --              | -            | --           | AO, PGS                   |
| 10.             | Shikonin          | -              | -              | ++              | -            | +            | PG                        |

153

154 Key: -- inactive, - less inactive, + Active and ++ More active

155 AR = Androgen Receptor, AO = Amine Oxidase A & PGS=Prostaglandin G/H Synthase

156 1

157

158 The predicted toxicity profile of the selected compounds shows that all the

159 compounds are likely to be relatively safe. Which makes them good potential

160 candidates for anti-infectives because the chances of achieving selective toxicity is

161 high. Baicalin is most likely the safest.

## 162 **Discussion**

163

164 Two compounds among the top six selected for each target, solanidine and sylibinin

165 were observed to have good binding affinity on both the 6vsb and the 6flu7. This

166 make them potential multitarget acting inhibitors on the SARS-COV2. Solanidine is a

167 Steroidal glycoalkaloids found in potatoes(10), although toxic to humans and

168 animals, Solanidine has been reported to be effective against herpes viruses (HSV),

169 herpes genitalis and herpes zoster(11) Its activity against HSV is attributed to the

170 presence of a sugar moiety(12). In silico method of drug screening using PROTOX II,

171 showed that Solanidine is cytotoxic and immunotoxic. Prototox II is a cost and time

172 conservative approach of testing and determining the toxicity of a compound to be

173 considered a drug of choice(13). It incorporates molecular similarity,

174 pharmacophores, fragment propensities and machine-learning models for the

175 prediction of various toxicity endpoints; such as acute toxicity, hepatotoxicity,

176 cytotoxicity, carcinogenicity, mutagenicity, immunotoxicity, adverse outcomes

177 pathways (Tox21) and toxicity targets(13)

178 A safe drug must not be toxic to its host target. Based on the Protox II evaluation of

179 Toxicity, Dammarenolic acid emerges as the compound of choice with the least

180 toxicity. Dammarenolic acid have been reported as effective antiviral agents

181 Dammarenolic acid **potently inhibited the in vitro replication of other retroviruses,**

182 including Simian immunodeficiency virus and Murine leukemic virus in vector-based  
183 antiviral screening studies and has been proposed as a potential lead compound in  
184 the development of anti-retrovirals. (14) The compound is cytotoxic and demonstrate  
185 potential against respiratory syncytial virus(15). We therefore propose that the  
186 evaluation of Dammarenolic acid will hold the key to COVID19 drug considering its  
187 drugability and low toxicity.

188

189 This study proposes a potential re-purposing of silybinin for the management of  
190 COVID19 diseases. Silybinin(Silymarin) possesses potent antiviral activities against  
191 numerous viruses, particularly hepatitis C virus (HCV)(16, 17) It has been reported to  
192 have activities against a wide range of viral groups including flaviviruses (hepatitis C  
193 virus and dengue virus), togaviruses (Chikungunya virus and Mayaro virus), influenza  
194 virus, human immunodeficiency virus, and hepatitis B virus(16). Silymarin inhibits  
195 HCV in both *in vitro* and *in vivo* by inhibiting HCV entry, RNA synthesis, viral protein  
196 expression and infectious virus production; in addition it also acts by blocking of the  
197 virus cell-to-cell spread(18). As an FDA approved drug for the management of  
198 Hepatitis disease. In silico analysis of this drugs in this study has shown that it has  
199 activity against SAR COV 2 S-glycoprotein and proteas(M<sup>pro</sup>) targets making it a drug  
200 to be considered with multi-target ability in the management of this disease.

201

202

203

204

#### 205 **4. Materials and Methods**

206 Plant Compounds with antiviral activities were mined from PubChem data base  
207 (<https://pubchem.ncbi.nlm.nih.gov/>). Two proteins including the main protease  
208 (6lu7) and the crystal structure of COVID-19 main protease(19) in complex with an  
209 inhibitor N3 and the Spike glycoprotein, N-ACETYL-D-GLUCOSAMINE  
210 (6vsb[10.1126/science.abb2507](https://doi.org/10.1126/science.abb2507)) were downloaded from the protein database (PDB).  
211 The proteins were prepared using Discovery studio (version)(20) and a rigid docking  
212 scoring function was carried out using PyRx software(21). The results of the dock  
213 poses were visualized using Discovery Studio.

214 The Physicochemical properties and druggability of selected compounds were  
215 predicted using SwissADME(22) and Molinspiration(23) platforms and their  
216 predicted toxicity profile also compared using the PROTOX platform(24)

217

#### 218 **5. Conclusions**

219 From the 22 phyto-compounds that were virtually screened, Scopodulcic acid and  
220 Dammarenolic acid showed the best binding energies with the Spike glycoprotein  
221 (6vsb) and the M<sup>Pro</sup> (6flu7) respectively. This makes them potential lead compounds  
222 for development into candidates against the SARS COV 2. Furthermore, the FDA  
223 approved drug silybinin (Legalon) with good binding affinity on the two targets can  
224 be evaluated further for possible repurposing against the SARS COV2 virus.

225

226 **Funding:** This research received no external funding

227 **Conflicts of Interest:** The authors declare no conflict of interest

#### 228 **Reference:**

- 229 1. Zhou P, Yang X-L, Wang X-G, Hu B, Zhang L, Zhang W, et al. A pneumonia  
230 outbreak associated with a new coronavirus of probable bat origin. 2020:1-4.  
231 2. Drosten C, Günther S, Preiser W, Van Der Werf S, Brodt H-R, Becker S, et al.  
232 Identification of a novel coronavirus in patients with severe acute respiratory  
233 syndrome. 2003;348(20):1967-76.

- 234 3. Walls AC, Park Y-J, Tortorici MA, Wall A, McGuire AT, Veesler DJC. Structure,  
235 function, and antigenicity of the SARS-CoV-2 spike glycoprotein. 2020.
- 236 4. Zaki AM, Van Boheemen S, Bestebroer TM, Osterhaus AD, Fouchier RAJNEJoM.  
237 Isolation of a novel coronavirus from a man with pneumonia in Saudi Arabia.  
238 2012;367(19):1814-20.
- 239 5. Neher RA, Dyrdak R, Druelle V, Hodcroft EB, Albert JJSMW. Potential impact of  
240 seasonal forcing on a SARS-CoV-2 pandemic. 2020;150(1112).
- 241 6. Anand K, Ziebuhr J, Wadhwani P, Mesters JR, Hilgenfeld RJS. Coronavirus main  
242 proteinase (3CLpro) structure: basis for design of anti-SARS drugs.  
243 2003;300(5626):1763-7.
- 244 7. Hilgenfeld RJTFj. From SARS to MERS: crystallographic studies on coronaviral  
245 proteases enable antiviral drug design. 2014;281(18):4085-96.
- 246 8. Ferenci P, Scherzer TM, Kerschner H, Rutter K, Beinhardt S, Hofer H, et al.  
247 Silibinin is a potent antiviral agent in patients with chronic hepatitis C not responding  
248 to pegylated interferon/ribavirin therapy. 2008;135(5):1561-7.
- 249 9. Chen L, Li J, Luo C, Liu H, Xu W, Chen G, et al. Binding interaction of  
250 quercetin-3- $\beta$ -galactoside and its synthetic derivatives with SARS-CoV 3CLpro:  
251 Structure–activity relationship studies reveal salient pharmacophore features.  
252 2006;14(24):8295-306.
- 253 10. Ginzberg I, Tokuhisa JG, Veilleux REJPR. Potato steroidal glycoalkaloids:  
254 biosynthesis and genetic manipulation. 2009;52(1):1-15.
- 255 11. Friedman M, McDonald GM, Filadelfi-Keszi MJCRiPS. Potato glycoalkaloids:  
256 chemistry, analysis, safety, and plant physiology. 1997;16(1):55-132.
- 257 12. Thorne H, Clarke G, Skuce RJAr. The inactivation of herpes simplex virus by some  
258 Solanaceae glycoalkaloids. 1985;5(6):335-43.
- 259 13. Banerjee P, Eckert AO, Schrey AK, Preissner RJNar. ProTox-II: a webserver for  
260 the prediction of toxicity of chemicals. 2018;46(W1):W257-W63.
- 261 14. Esimone CO, Eck G, Nworu CS, Hoffmann D, Überla K, Proksch PJP.  
262 Dammarenolic acid, a secodammarane triterpenoid from *Aglaia* sp. shows potent  
263 anti-retroviral activity in vitro. 2010;17(7):540-7.
- 264 15. Esimone C, Eck G, Duong T, Überla K, Proksch P, Grunwald TJDP-AIJoPS.  
265 Potential anti-respiratory syncytial virus lead compounds from *Aglaia* species.  
266 2008;63(10):768-73.
- 267 16. Liu C-H, Jasley A, Hsu H-Y, Lin L-TJM. Antiviral Activities of Silymarin and  
268 Derivatives. 2019;24(8):1552.
- 269 17. Polyak SJ, Ferenci P, Pawlotsky JMjH. Hepatoprotective and antiviral functions of  
270 silymarin components in hepatitis C virus infection. 2013;57(3):1262-71.
- 271 18. Wagoner J, Negash A, Kane OJ, Martinez LE, Nahmias Y, Bourne N, et al. Multiple  
272 effects of silymarin on the hepatitis C virus lifecycle. 2010;51(6):1912-21.
- 273 19. 10.2210/pdb6LU7/pdb.
- 274 20. Biovia DSJSD. Discovery Studio Modeling Environment Release 2017, Dassault  
275 Systemes. 2016.

- 276 21. Dallakyan S, Olson AJ. Small-molecule library screening by docking with PyRx.  
277 Chemical biology: Springer; 2015. p. 243-50.
- 278 22. Daina A, Michielin O, Zoete VJSr. SwissADME: a free web tool to evaluate  
279 pharmacokinetics, drug-likeness and medicinal chemistry friendliness of small  
280 molecules. 2017;7:42717.
- 281 23. Jarrahpour A, Motamedifar M, Zarei M, Yousoufi M, Mimouni M, Chohan Z, et al.  
282 Petra, osiris, and molinspiration together as a guide in drug design: predictions and  
283 correlation structure/antibacterial activity relationships of new N-Sulfonyl monocyclic  
284  $\beta$ -lactams. 2010;185(2):491-7.
- 285 24. Drwal MN, Banerjee P, Dunkel M, Wettig MR, Preissner RJNar. ProTox: a web  
286 server for the in silico prediction of rodent oral toxicity. 2014;42(W1):W53-W8.

287

**Table 1.** Comparison of Binding affinities of library to some known ligands and the co-crystalised ligand

| <b>Protein target</b> | <b>Co crystalized ligand</b> | <b>Ligands(drugs) used in treatment</b> | <b>Phytochemicals</b>  |
|-----------------------|------------------------------|-----------------------------------------|------------------------|
| 6LU7                  |                              | Remesivir -7.1                          | Dammarenolic acid -7.2 |
|                       |                              | Favipiravir -5.3                        | Quercetin -7.1         |
|                       |                              | Chloroquine -5.2                        | Solanidine -7.0        |
|                       |                              |                                         | Silymarin -6.9         |
|                       |                              |                                         | Silvestrol -6.7        |
|                       |                              |                                         | Shikonin -6.6          |
| 6VSB                  |                              | Remesivir -7.3                          | Scopadulcic acid -9.6  |
|                       |                              | Favipiravir -5.3                        | Baicalin -9.4          |
|                       |                              | Chloroquine -5.2                        | Legalon -9.2           |
|                       |                              |                                         | Solanidine -9.1        |
|                       |                              |                                         | Naringenin -9.0        |
|                       |                              |                                         | Oleanane -9.0          |
|                       |                              |                                         | Silymarin -8.6         |

**TABLE 2** binding affinities of the compounds on the 6vsb and their Interaction with the binding site

| <b>S/N</b> | <b>Ligands</b>   | <b>Binding Affinity (Kcal/Mol)</b> | <b>Hydrogen Bond Interaction with Residues</b>             | <b>Hydrophobic Interaction with Residues</b>                                                                                                                                                      | <b>Bond</b> |
|------------|------------------|------------------------------------|------------------------------------------------------------|---------------------------------------------------------------------------------------------------------------------------------------------------------------------------------------------------|-------------|
| <b>1.</b>  | Scopadulcic Acid | -9.6                               | GLN B: 913                                                 | TYR C:904, GLY B:1093, VAL B:911, ARG B: 1107, ASN B:907, THR B:912, ASN B:1119, GLN B:1113, GLY B: 910, GLN B:1106, GLU B:1092, PHE A:1121, ARG A:1091                                           |             |
| <b>2.</b>  | Baicalin         | -9.4                               | ARG B:1039, ARG A:1039, ARG C:1039, ALA B:1020, ASN C:1023 | ALA C:1026, LEU B:1024, GLN C:784, SER C:1030, ASP B:1041, LEU C:1024, THR C:1027, PHE B:1042, PHE C:1042, PHE A:1042, THR B:1027, SER B:1021, GLU C:780.                                         |             |
| <b>3.</b>  | Sylibinin        | -9.2                               | GLU A:954, ARG B:765                                       | GLU A:1017, ARG A:1014, ALA B:766, LYS B:776, LYS A:947, LEU A:948, PRO A:728, VAL A:951, ILE A:1018, ALA B:766, GLN A:957, GLN B:762, GLN A:1010, ILE A:1013, LEU B:1012, ARG B:1019, GLU B:773. |             |
| <b>4.</b>  | Solanidine       | -9.1                               |                                                            | TYR A:369, TYR C:489, ARG C:454, PRO C:491, TYR C:421, ASN C:460, LEU C:461                                                                                                                       |             |
| <b>5.</b>  | Naringenin       | -9.0                               | GLU C:1092, ARG C:1107, ASN C:1108, GLY C:910, ILE C:909   | ASN C:907, THR C:912, GLN C:1113, ARG B:1091, GLU B:1092, GLY C:1093, GLN C:1106, TYR A:904                                                                                                       |             |
| <b>6.</b>  | Oleanane         | -9                                 |                                                            | LEU A:1141, ASP C:1118, LEU C:1141, PRO A:1140, ASP A:1118, THR A:1117, THR B:1116, ASP B:1118, PRO B:1140, GLU B:1144, ASP A:1139, GLU A:1144                                                    |             |



**TABLE 3** binding affinities of the compounds on the 6LU7 and their Interaction with the binding site

| <b>S/N</b> | <b>Ligands</b>    | <b>Binding Affinity (Kcal/Mol)</b> | <b>Hydrogen Bond Interaction with Residues</b> | <b>Hydrophobic Interaction with Residues</b>                                                                                                                        | <b>Bond</b> |
|------------|-------------------|------------------------------------|------------------------------------------------|---------------------------------------------------------------------------------------------------------------------------------------------------------------------|-------------|
| <b>1.</b>  | Dammarenolic acid | -7.2                               | THR A: 111,<br>GLN A: 110,<br>GLN A: 107       | VAL A:104, ARG A: 105, ILE A: 106, THR A: 292, PHE A: 112, GLN A: 127, ASP A: 295, ASN A: 152, PHE A: 294, PHE A: 294, PHE A: 8, ASP A: 153, SER A: 158, ILE A: 152 |             |
| <b>2.</b>  | Quercetin         | -7.1                               | -----                                          | -----                                                                                                                                                               |             |
| <b>3.</b>  | Solanidine        | -7.0                               | -----                                          | VAL A: 104, LYS A: 102, SER A: 158, ASP A: 153, ILE A: 152, ASN A: 151, ASN A: 151, PHE A: 8, ARG A: 105, GLN A: 107, ILE A: 106                                    |             |
| <b>4.</b>  | Silybinin         | -6.8                               | ARG A: 105,<br>ASP A: 176                      | ASN A: 180, GLU A: 178, PHE A: 103, VAL A: 104, SER A: 158, ASN A: 151, THR A: 111, GLN A: 110, ILE A: 106, GLN A: 107                                              |             |
| <b>5.</b>  | Loliolide         | -6.7                               | -----                                          | -----                                                                                                                                                               |             |
| <b>6.</b>  | Shikonin          | -6.6                               | THR A: 111,<br>SER A: 158                      | PHE A: 294, PHE A: 8, GLN A: 110, ILE A: 106, ASN A: 151, PHE A: 112, LYS A: 102, ASP A: 153, VAL A: 104                                                            |             |

**Table 4.** Comparison of the calculated cLog P values for the selected compounds

| S/N | Compound          | SwisADME<br>cLog P | Molinspiration<br>cLog p | Mean calculated<br>P | cLog |
|-----|-------------------|--------------------|--------------------------|----------------------|------|
| 1.  | Scopodulcic acid  | 4.57               | 5.01                     | 4.79                 |      |
| 2.  | Baicalin          | 0.22               | 0.55                     | 0.77                 |      |
| 3.  | Sylibinin         | 1.59               | 1.47                     | 3.06                 |      |
| 4.  | Solanidine        | 5.01               | 5.93                     | 5.47                 |      |
| 5.  | Naringenin        | 1.84               | 2.12                     | 1.98                 |      |
| 6.  | Oleanane          | 8.57               | 8.86                     | 8.72                 |      |
| 7.  | Dammarenolic acid | 6.74               | 8.08                     | 7.41                 |      |
| 8.  | Quercetin         | 1.23               | 1.68                     | 1.46                 |      |
| 9.  | Loliolide         | 1.53               | 1.84                     | 1.69                 |      |
| 10. | Shikonin          | 2.08               | 2.02                     | 2.05                 |      |

clog P = octanol/water coefficient

**Table 5. Drug likeness**

| <b>S/N</b> | <b>Compound</b>      | <b>Mol.<br/>Wt<sup>a</sup>(g/mol)</b> | <b>TPSA<sup>b</sup></b> | <b>HBA<sup>c</sup></b> | <b>HBD<sup>d</sup></b> | <b>RB<sup>e</sup></b> | <b>cLogP<sup>f</sup></b> | <b>Lipinski<br/>filter</b> | <b>Veber<br/>filter</b> |
|------------|----------------------|---------------------------------------|-------------------------|------------------------|------------------------|-----------------------|--------------------------|----------------------------|-------------------------|
| 1.         | Scopodulcic<br>acid  | 438.56                                | 80.67                   | 5                      | 1                      | 4                     | 4.79                     | +                          | +                       |
| 2.         | Baicalin             | 446.36                                | 187.12                  | 11                     | 6                      | 4                     | 0.77                     | -                          | -                       |
| 3.         | Sylibinin            | 482.44                                | 155.14                  | 10                     | 5                      | 4                     | 3.06                     | +                          | -                       |
| 4.         | Solanidine           | 397.64                                | 23.47                   | 2                      | 1                      | 0                     | 5.47                     | +                          | -                       |
| 5.         | Naringenin           | 272.25                                | 86.99                   | 5                      | 3                      | 1                     | 1.98                     | +                          | +                       |
| 6.         | Oleanane             | 412.75                                | 0.00                    | 0                      | 0                      | 0                     | 8.72                     | +                          | +                       |
| 7.         | Dammarenolic<br>acid | 458.72                                | 57.53                   | 3                      | 2                      | 1                     | 7.41                     | +                          | +                       |
| 8.         | Quercetin            | 302.24                                | 131.36                  | 7                      | 5                      | 1                     | 1.46                     | +                          | +                       |
| 9.         | Loliolide            | 196.24                                | 46.53                   | 3                      | 1                      | 0                     | 1.69                     | +                          | +                       |
| 10.        | Shikonin             | 288.3                                 | 94.83                   | 5                      | 3                      | 3                     | 2.05                     | +                          | +                       |

<sup>a</sup>Mol. Wt.: Molecular weight

<sup>b</sup>TPSA: Total Polar Surface Area

<sup>c</sup>No. HBA: Number of hydrogen bond acceptors

<sup>d</sup>No. HBD: Number of hydrogen bond donors

<sup>e</sup>No. RB: Number of rotatable bonds

<sup>f</sup>Mean clog P: Mean of calculated log P values

Table 6. Predicted Toxicity Profile of the compounds using PROTOX II

| <b>S/<br/>N</b> | <b>Compound</b>   | Hepatotoxicity | ImmunoToxicity | Carcinogenicity | Mutagenicity | Cytotoxicity | Possible Toxicity Targets |
|-----------------|-------------------|----------------|----------------|-----------------|--------------|--------------|---------------------------|
| 1.              | Scopodulcic acid  | -              | ++             | -               | -            | -            | AR, AO, PGS               |
| 2.              | Baicalin          | --             | --             | +               | -            | --           | AO, PGS                   |
| 3.              | Sylibinin         | --             | ++             | -               | --           | --           | PGS                       |
| 4.              | Solanidine        | --             | ++             | -               | --           | +            | AR, PGS                   |
| 5.              | Naringenin        | -              | --             | -               | --           | +            | AR, PGS                   |
| 6.              | Oleanane          | --             | --             | ++              | --           | --           |                           |
| 7.              | Dammarenolic acid | -              | -              | --              | --           | --           | AR, AO PGS                |
| 8.              | Quercetin         | -              | +              | --              | -            | --           | AO, AR, PGS               |
| 9.              | Loliolide         | -              | +              | --              | -            | --           | AO, PGS                   |
| 10.             | Shikonin          | -              | -              | ++              | -            | +            | PG                        |

Key: -- inactive, - less inactive, + Active and ++ More active

AR = Androgen Receptor, AO = Amine Oxidase A & PGS=Prostaglandin G/H Synthase

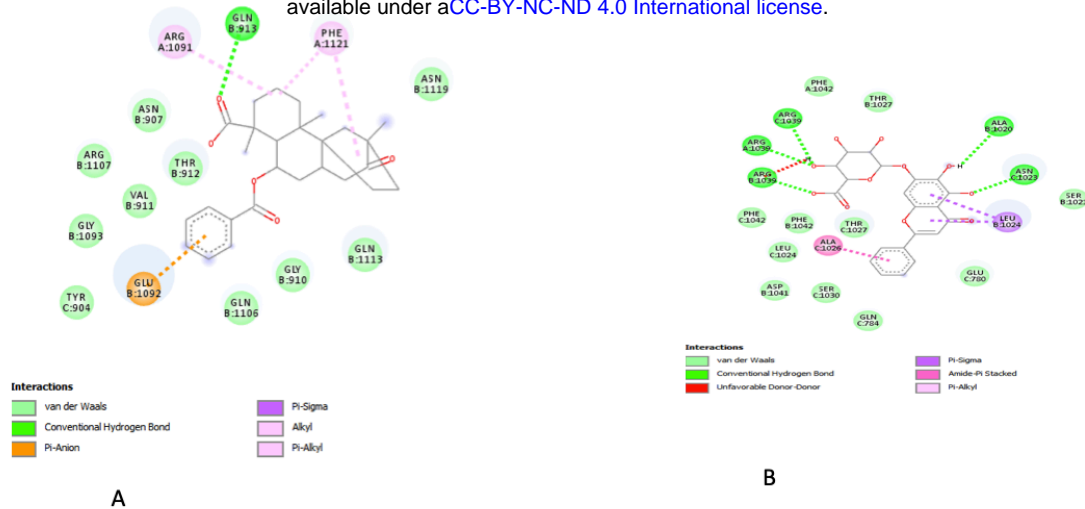

**Figure 1.** Best Binding pose and Interaction of (a) Scopoludcic acid and (b) Baicalin on the 6vsb protein.
